# Supplementary material for: Methylation-directed acetylation of histone H3 regulates developmental sensitivity to histone deacetylase inhibition
Source: PubMed Central journal article supplement (PMC8053100; doi:10.1093/nar/gkab154), 2021-03-15

**Fig. S1.** Development of Ax2 and *set1*<sup>-</sup> cells after 24 hours of 15 μM SAHA treatment.

Exponentially growing Ax2 and *set1*<sup>-</sup> cells were collected and washed twice with KK2 then transferred onto 1.5% agar ( $1.5 \times 10^6$  cells/cm<sup>2</sup>) containing 15 μM SAHA or DMSO vehicle control. Images were taken at 24 hours and representative images of two repeats are presented. Scale bar represents 1 mm.

**Fig S2.** Development of H3aK4A and H3bK4A cells after 24 hours of TSA treatment.

Exponentially growing H3aK4A, H3bK4A or control H3aK4K cells were collected and washed twice with KK2 then transferred onto 1.5% agar ( $1.5 \times 10^6$  cells/cm<sup>2</sup>) containing increasing concentrations of TSA or DMSO vehicle control. Images were taken at 24 hours and representative images of three repeats are presented. Scale bar represents 1 mm.

**Fig S3.** Structure alignment of the TTD of *Dictyostelium* Sgf29 to budding yeast and human counterparts.

The predicted tertiary structure of the TTD of *Dictyostelium* Sgf29 is shown by a blue ribbon while that of human (HsSGF29) or budding yeast (ScSGF29) is shown in grey. Conserved binding residues in *Dictyostelium* Sgf29 are shown as purple sticks. K4-trimethylated lysine is represented as a green stick. Structural prediction and comparison were done using Chimera (<https://www.cgl.ucsf.edu/chimera/>).

**Fig S4.** Purification of GST-TTD fusion proteins following expression in *E.coli*. GST-fusion proteins were purified using glutathione sepharose. Samples from stages of the purification were resolved by SDS-PAGE and proteins were visualized by staining with Coomassie blue for **A.** GST-TTD (42 kDa), **B.** GST-F359AY366ATTD (42 kDa) and **C.** GST (29kDa) in individual gels.

**Fig S5.** Generation and genotyping of *sgf29*<sup>-</sup> cells

**A.** Schematic representation of the gene replacement event to generate *sgf29*<sup>-</sup> cells. Exon, intron and intergenic regions are represented by a thick black solid line, a dashed line and a solid grey line respectively. The TTD, marked yellow, is located at the 3' end of the coding region. The 5' arm spanning 1 to 1084 relative to the start codon, 3' arm (1943 to 2877) and the BsR cassette was cloned into pJET1.2 vector to generate pJET\_ *sgf29*KO disruption vector.

Specific primer sets were designed to detect bsR insertion (P1 & P2; P3 & P4). A primer set (P1 & P4) flanking the linearized fragment was used to detect parental contamination. **B.** Map of the pJET\_sgf29KO disruption vector. The vector was digested using BsrGI and BstZ171 before transfected into parental Ax2 cells, as shown on the agarose gel. **c** gDNA was prepared from surviving clones after blasticidin selection. PCR screening was carried out using primer sets mentioned above. Gene replacement at the correct sites were detected by primer P1 and P2 with the PCR product at 1368 bp while that of P3 and P4 was at 1091 bp. Parental signal was detected using primer set P2 and P4, with a band at 3121 bp while the size after gene replacement is 3854 bp. Clone 1D5 (clone 1), 3E1 (clone 2) and 3H10 (clone 3) are disruptants and clone 1 is used for main figures.

**Fig S6.** Verification of *sgf29<sup>-</sup>* phenotypes using independent clones.

**A.** Histone-enriched acid extracts from TSA (4  $\mu$ M) treated developing Ax2<sup>bsR</sup> and two further independent clones of *sgf29<sup>-</sup>* cells were prepared after 0, 1, 2 or 4 hours of TSA treatment. Samples were resolved by 20% acid-urea electrophoresis and western blots were performed using anti-H3K4me3 and anti-H3 polyclonal antibodies. Position of histone H3 with decreasing net positive charge (0 – 3) are shown on both sides of each blot. **B,C** Cells from three independent *sgf29<sup>-</sup>* clones and Ax2<sup>bsR</sup> controls were washed with KK2 and allowed to develop on solid agar with 1  $\mu$ M TSA (**B**) or 15  $\mu$ M SAHA (**C**) for 24 hours as described in Fig. 1a. Images were taken at 24 hours and representative images of three repeats are presented. Clone 1 is used for main figures.

**Fig S7. Growth curve of Ax2<sup>bsR</sup>, *set1<sup>-</sup>* and *sgf29<sup>-</sup>* cells**

Exponentially growing cells were seeded at a density of  $7 \times 10^5$  cells/ml in HL5 and the cell density was monitored by manual counting over a 3-day period with 12 hours interval. Data was presented as mean  $\pm$  MSE. n = 3.

**Fig S8.** Maps of expression vectors used in this study. Please refer to Materials and Methods for detailed cloning steps.

## Supplemental Table S1

| Primer name     | Sequence (5' → 3')                    | Restriction enzyme sites | Mutation | Annotation                                                                                    |
|-----------------|---------------------------------------|--------------------------|----------|-----------------------------------------------------------------------------------------------|
| Tudor-F         | GCGAATTCAGTAGTGGAAATGGATTCCATGG       | EcoRI, NcoI              | N/A      | Used in cloning of wildtype TTD and the second stage of cloning the F359A/Y366ATTD            |
| Tudor-R         | CTCGAGACTAGTCTTATTTAAGGCCAC           | XhoI, SpeI               | N/A      |                                                                                               |
| Tudor-N-R       | AAAGGCGGTGGTATCGGGA <del>G</del> CCAT | N/A                      | AA to GC | Used in the first stage of PCR to amplify two fragment with each carrying one mutation in TTD |
| Tudor-C-F       | CCCGATACCACCGCCTTT <del>G</del> CTCC  | N/A                      | TA to GC |                                                                                               |
| DdSgf29_1-854_F | GGATCCAGATCTATGTCCGATGCTC             | BamHI, BglII             | N/A      | Used to clone 1-854 bp of <i>Dictyostelium Sgf29</i>                                          |
| DdSgf29_1-854_R | GTTGCATACCATGGAATCCA                  | NcoI                     | N/A      |                                                                                               |
| Sgf29KO_LR_R    | GACCAACCTGATCACTCTTTTCTTCATC          | N/A                      | N/A      | Used to clone 5' homology arm for the <i>Dictyostelium Sgf29</i> disruption vector            |
| P1/Sgf29KO_LR_L | CTCACATTCCACCATATACAC                 | N/A                      | N/A      |                                                                                               |
| P2              | GAAGTTATCATATGCCGCATGG                | N/A                      | N/A      | Primers on BsR casset                                                                         |
| P3              | ATGCTATACGAAGTTATCCGTGG               | N/A                      | N/A      |                                                                                               |
| P4/Sgf29KO_RR_R | CATTTCCATATTTATTTGTTGAGTCCC           | N/A                      | N/A      | Used to clone 3' homology arm for the <i>Dictyostelium Sgf29</i> disruption vector            |
| Sgf29KO_RR_F    | CATGTTGTGGCCTTAAATAAGTAGTTG           | N/A                      | N/A      |                                                                                               |
| pSgf29_F        | CTCGAGCCAATCCAAACAATTGCTATTACAAGTG    | XhoI                     | N/A      | Used to clone the promoter of <i>Dictyostelium Sgf29</i>                                      |
| pSgf29_R        | GATAGTAATTGAGCATCGGACAAGATCTTTTAATTG  | BglII                    | N/A      |                                                                                               |

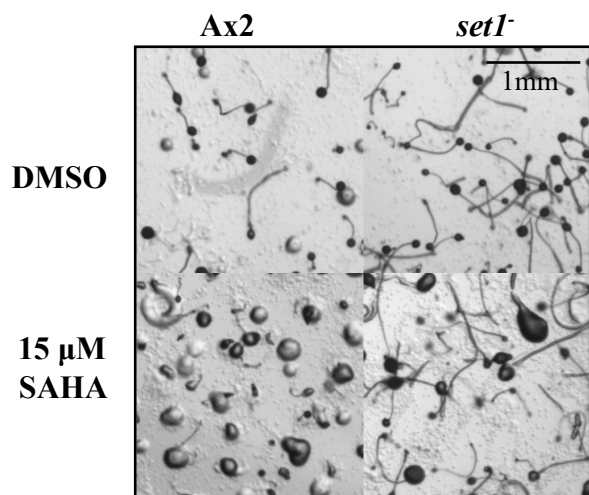

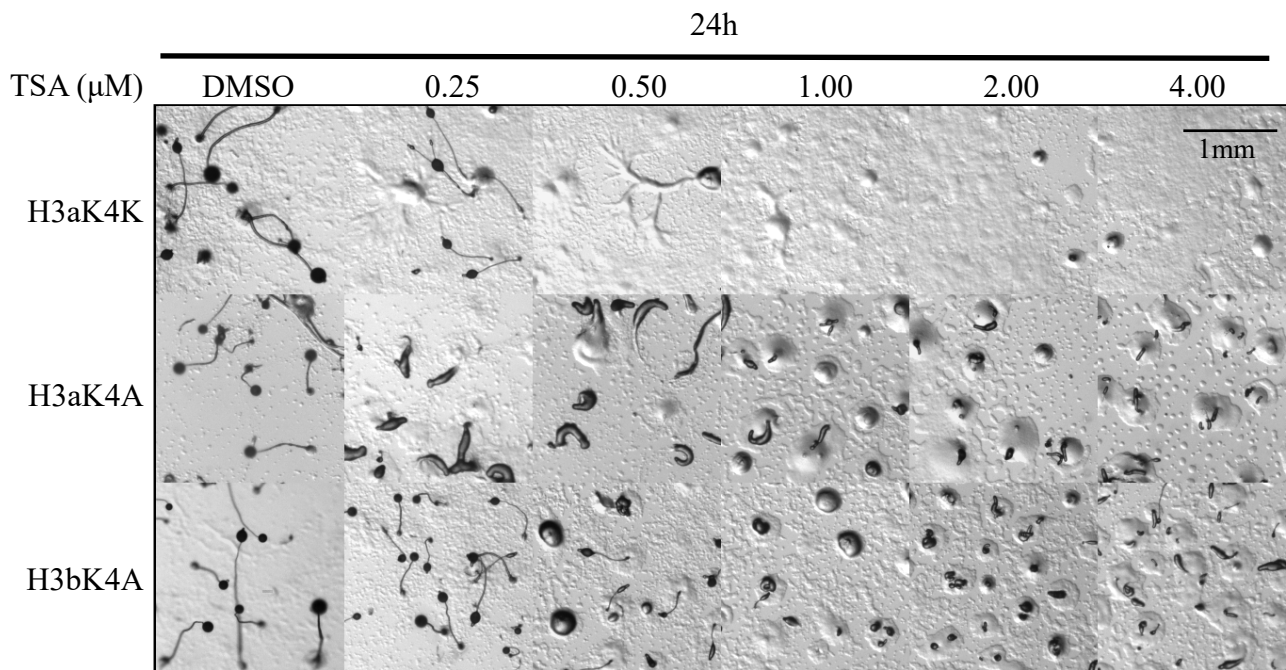

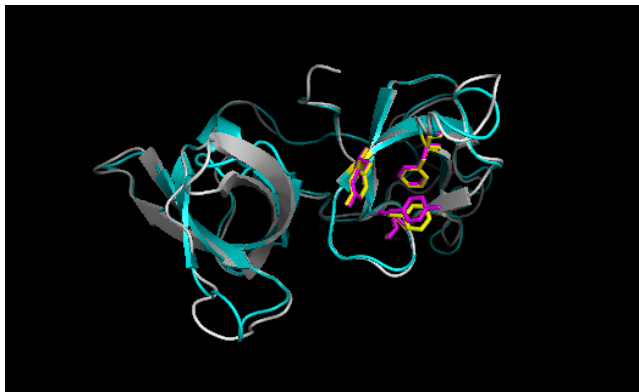

Tandem tudor domain  
DdSgf29 V.S. HsSGF29

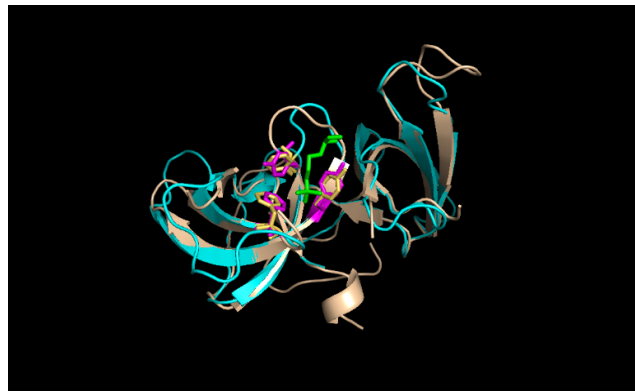

Tandem tudor domain  
DdSgf29 V.S. ScSGF29

### GST-TTD

**A**

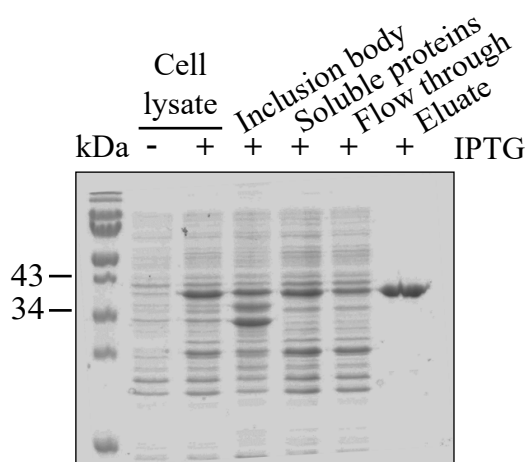

### GST-F359AY366ATTD

**B**

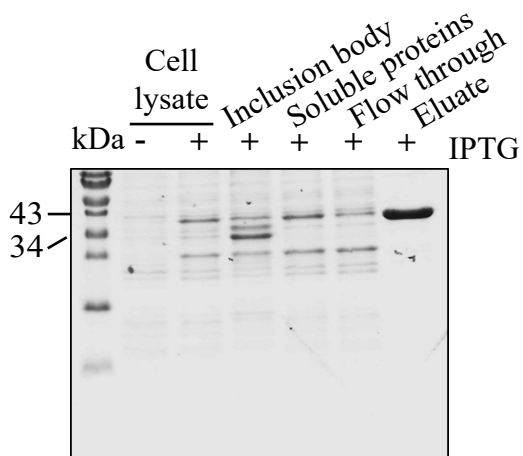

**C**

### GST

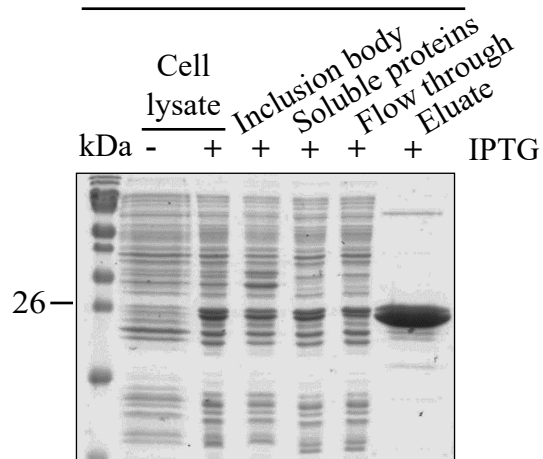

A

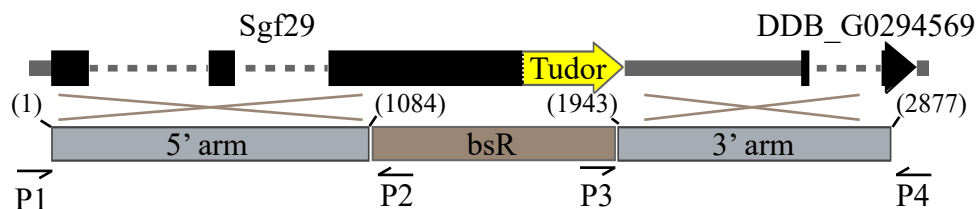

B

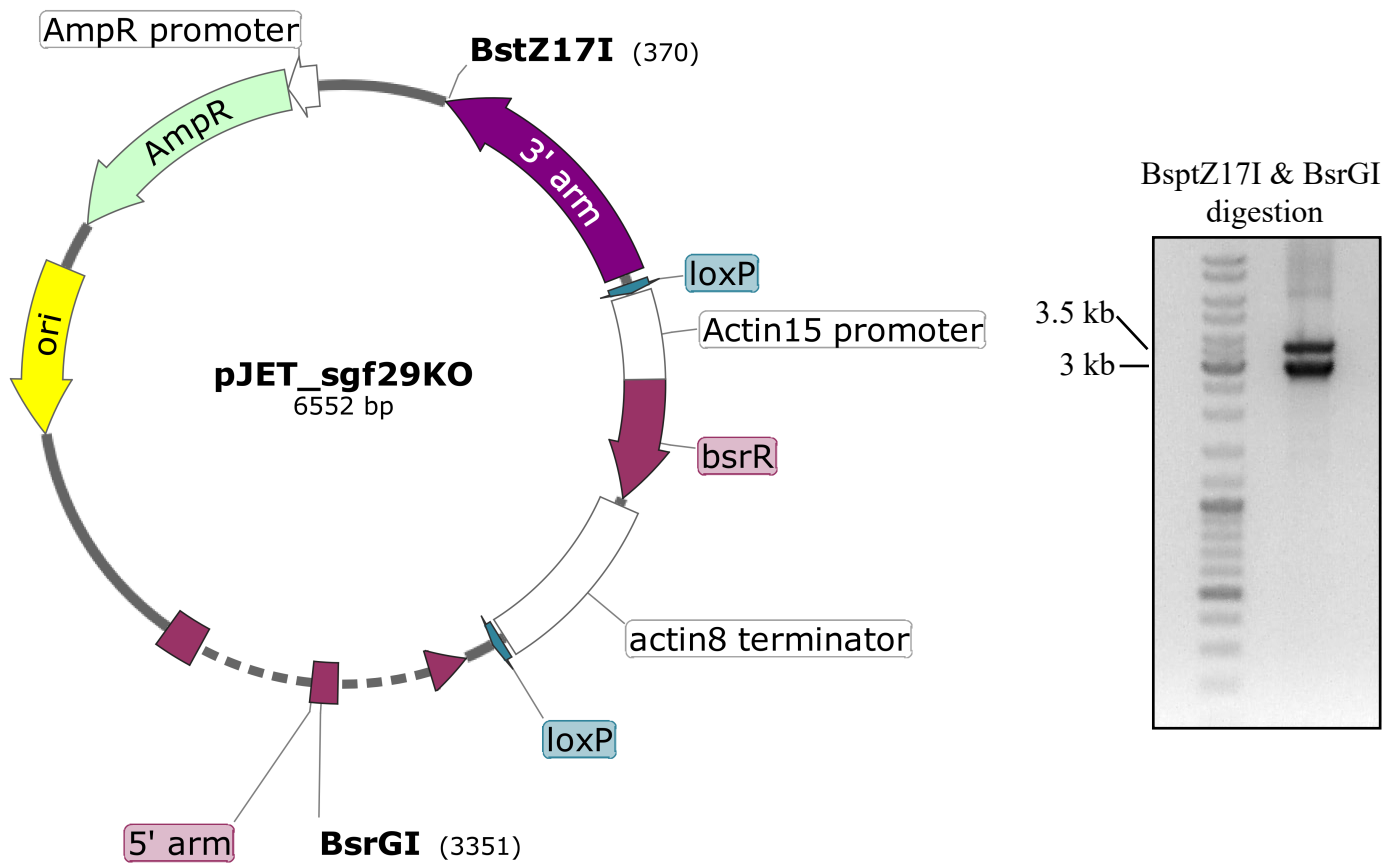

C

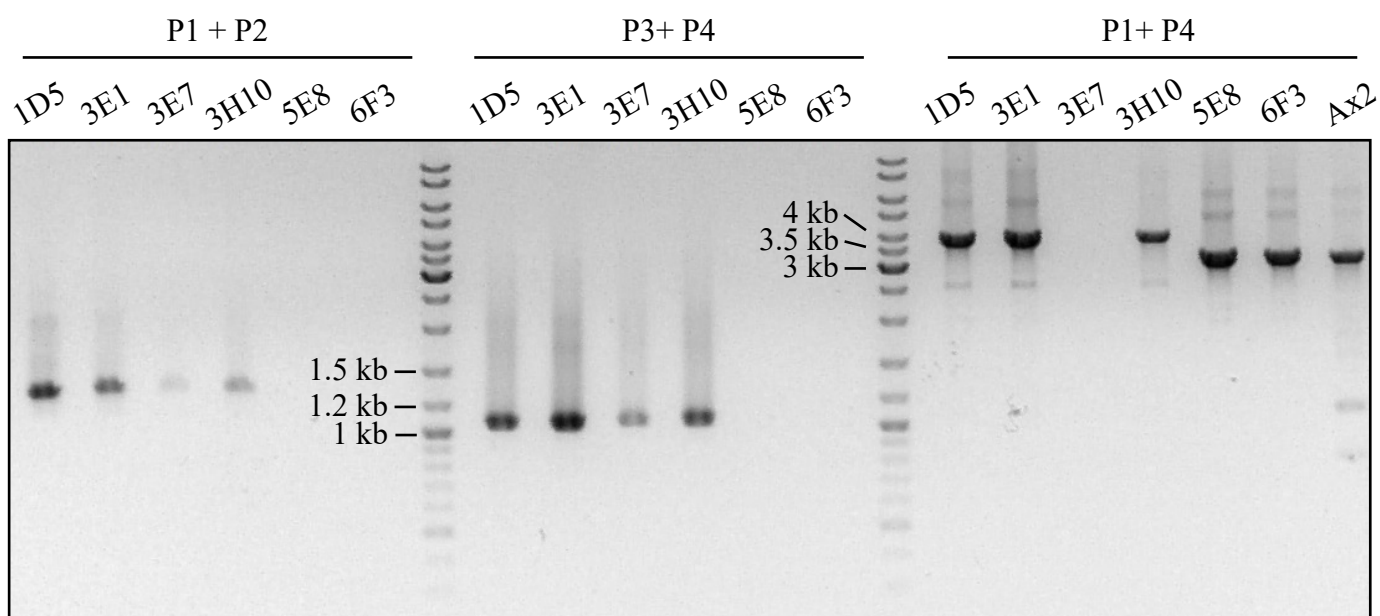



A

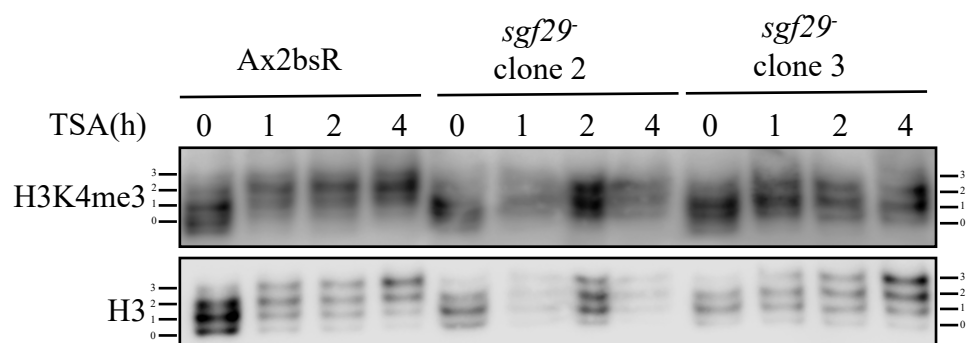

B

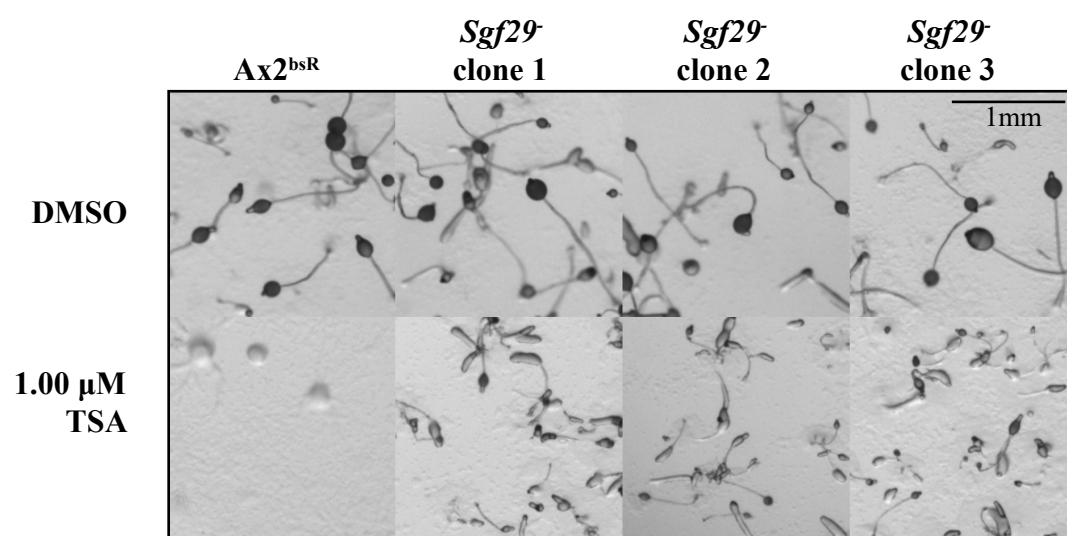

C

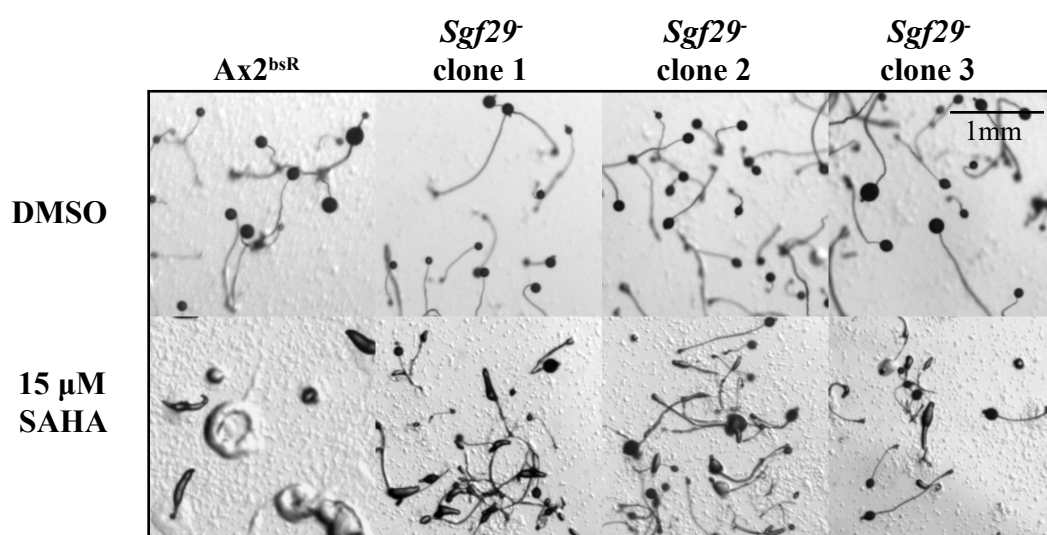

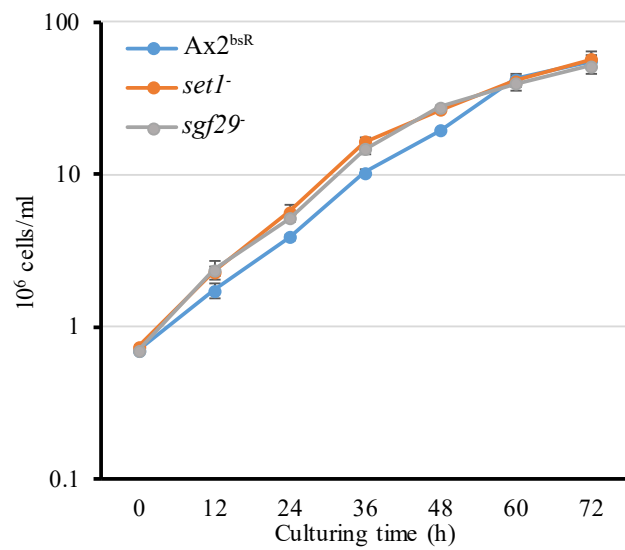

Fig. S8

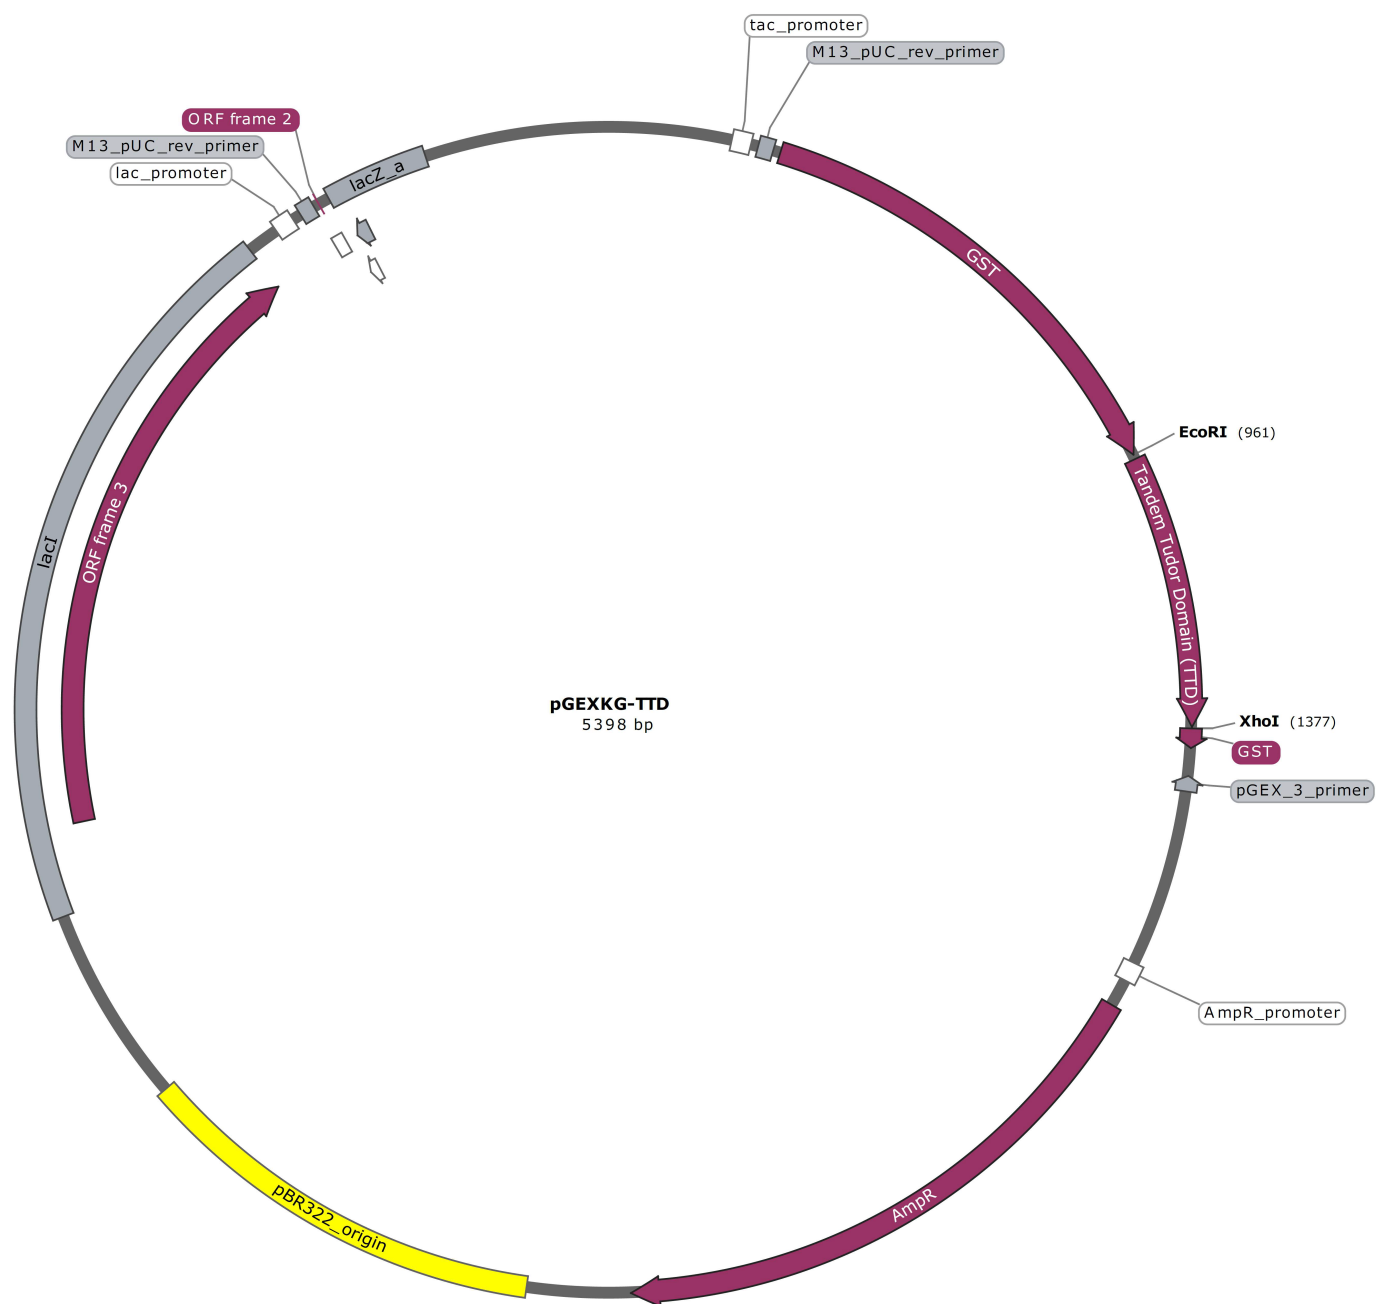

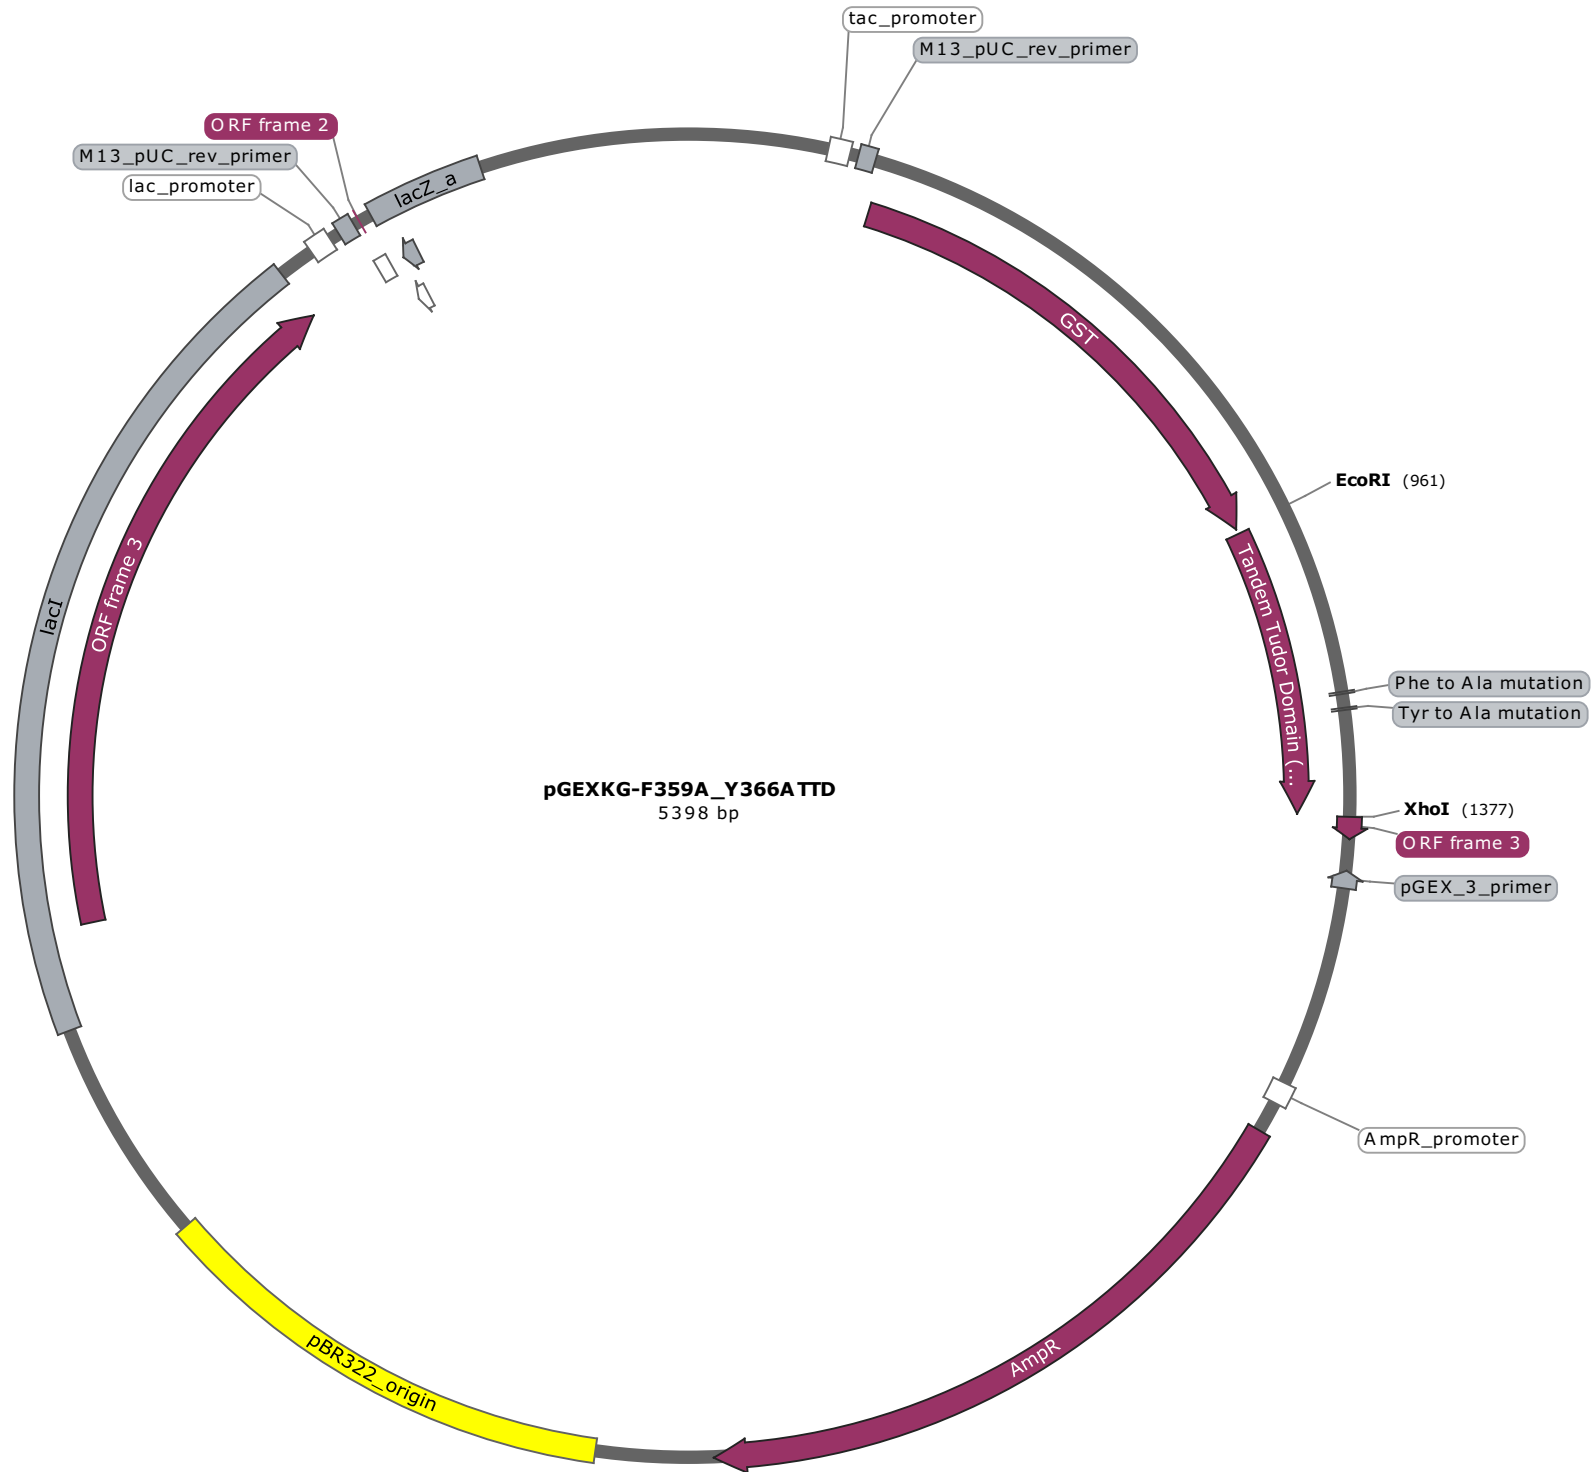

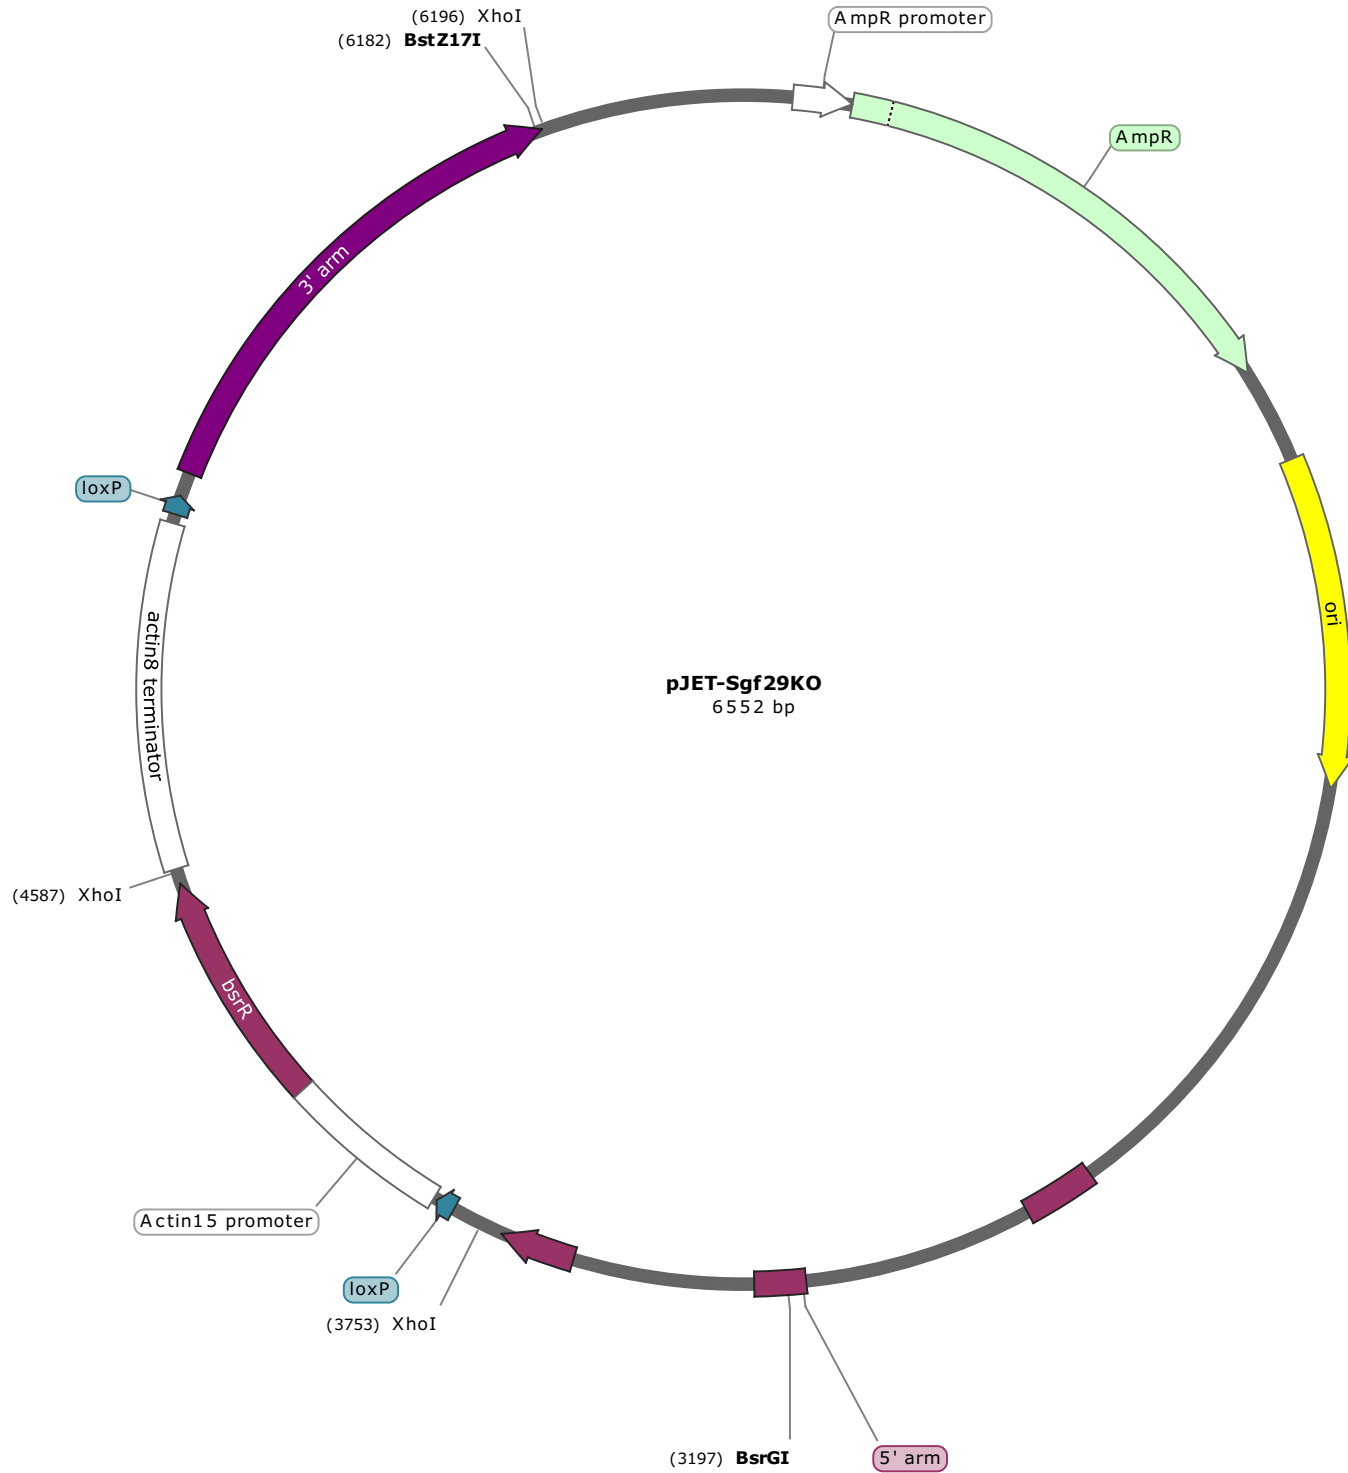

# Cloning of pJET\_Sgf29KO.pdf

7033 x 5392

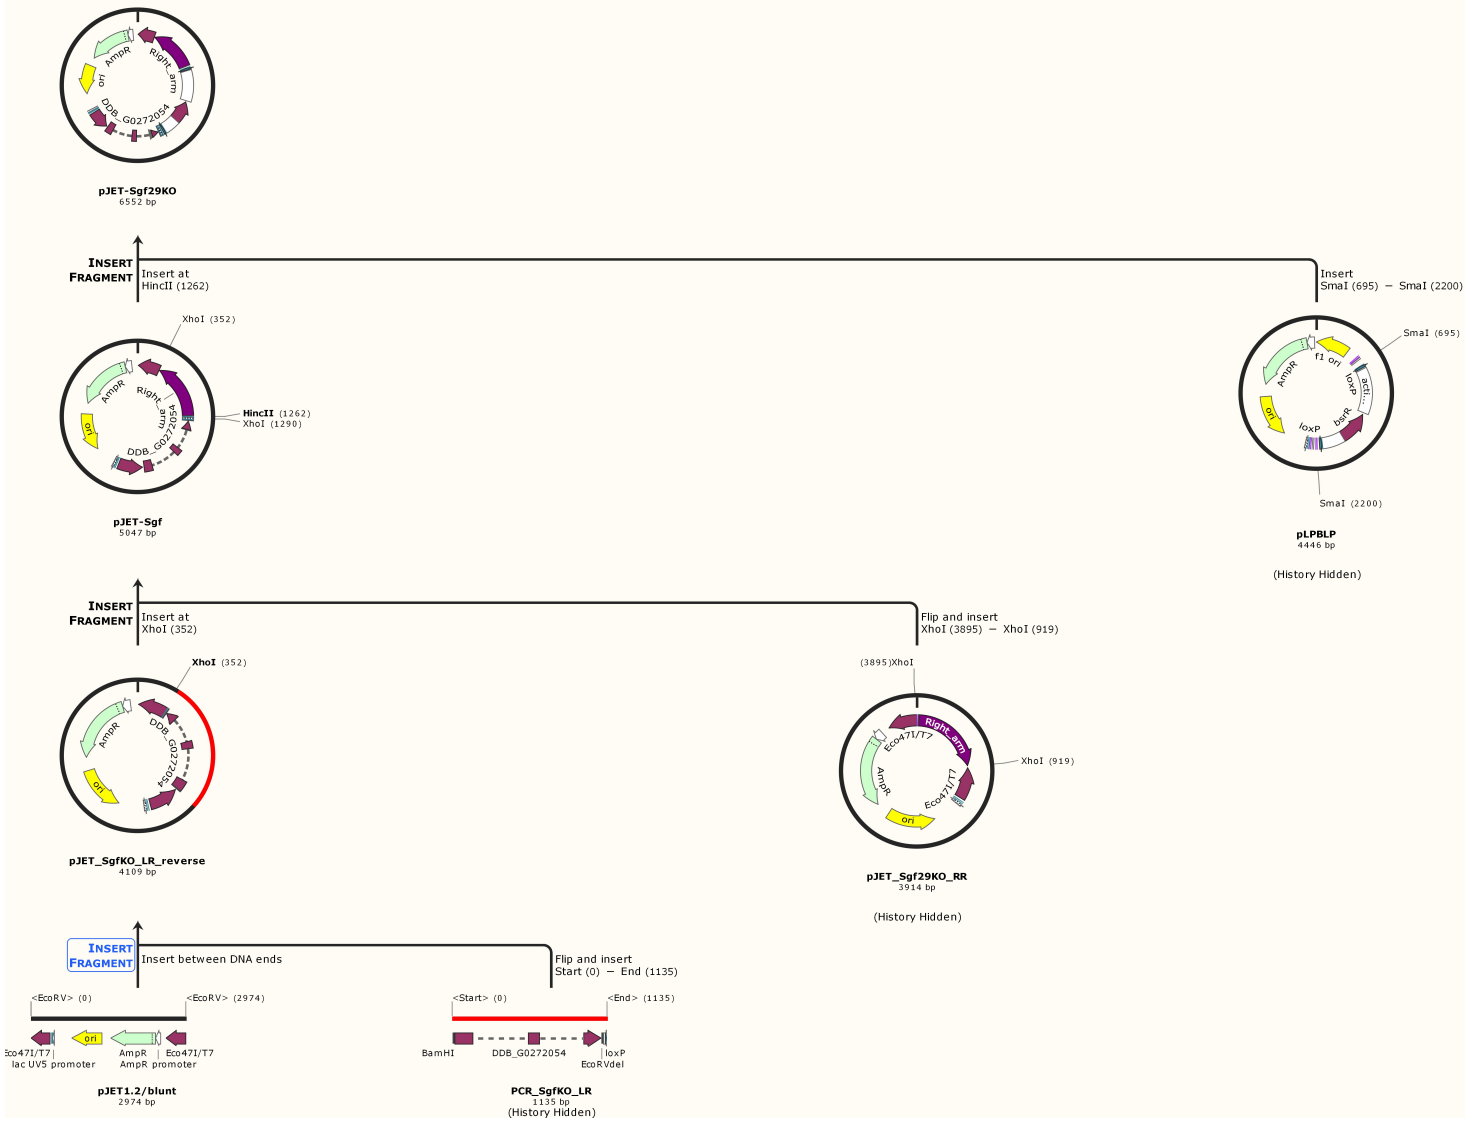

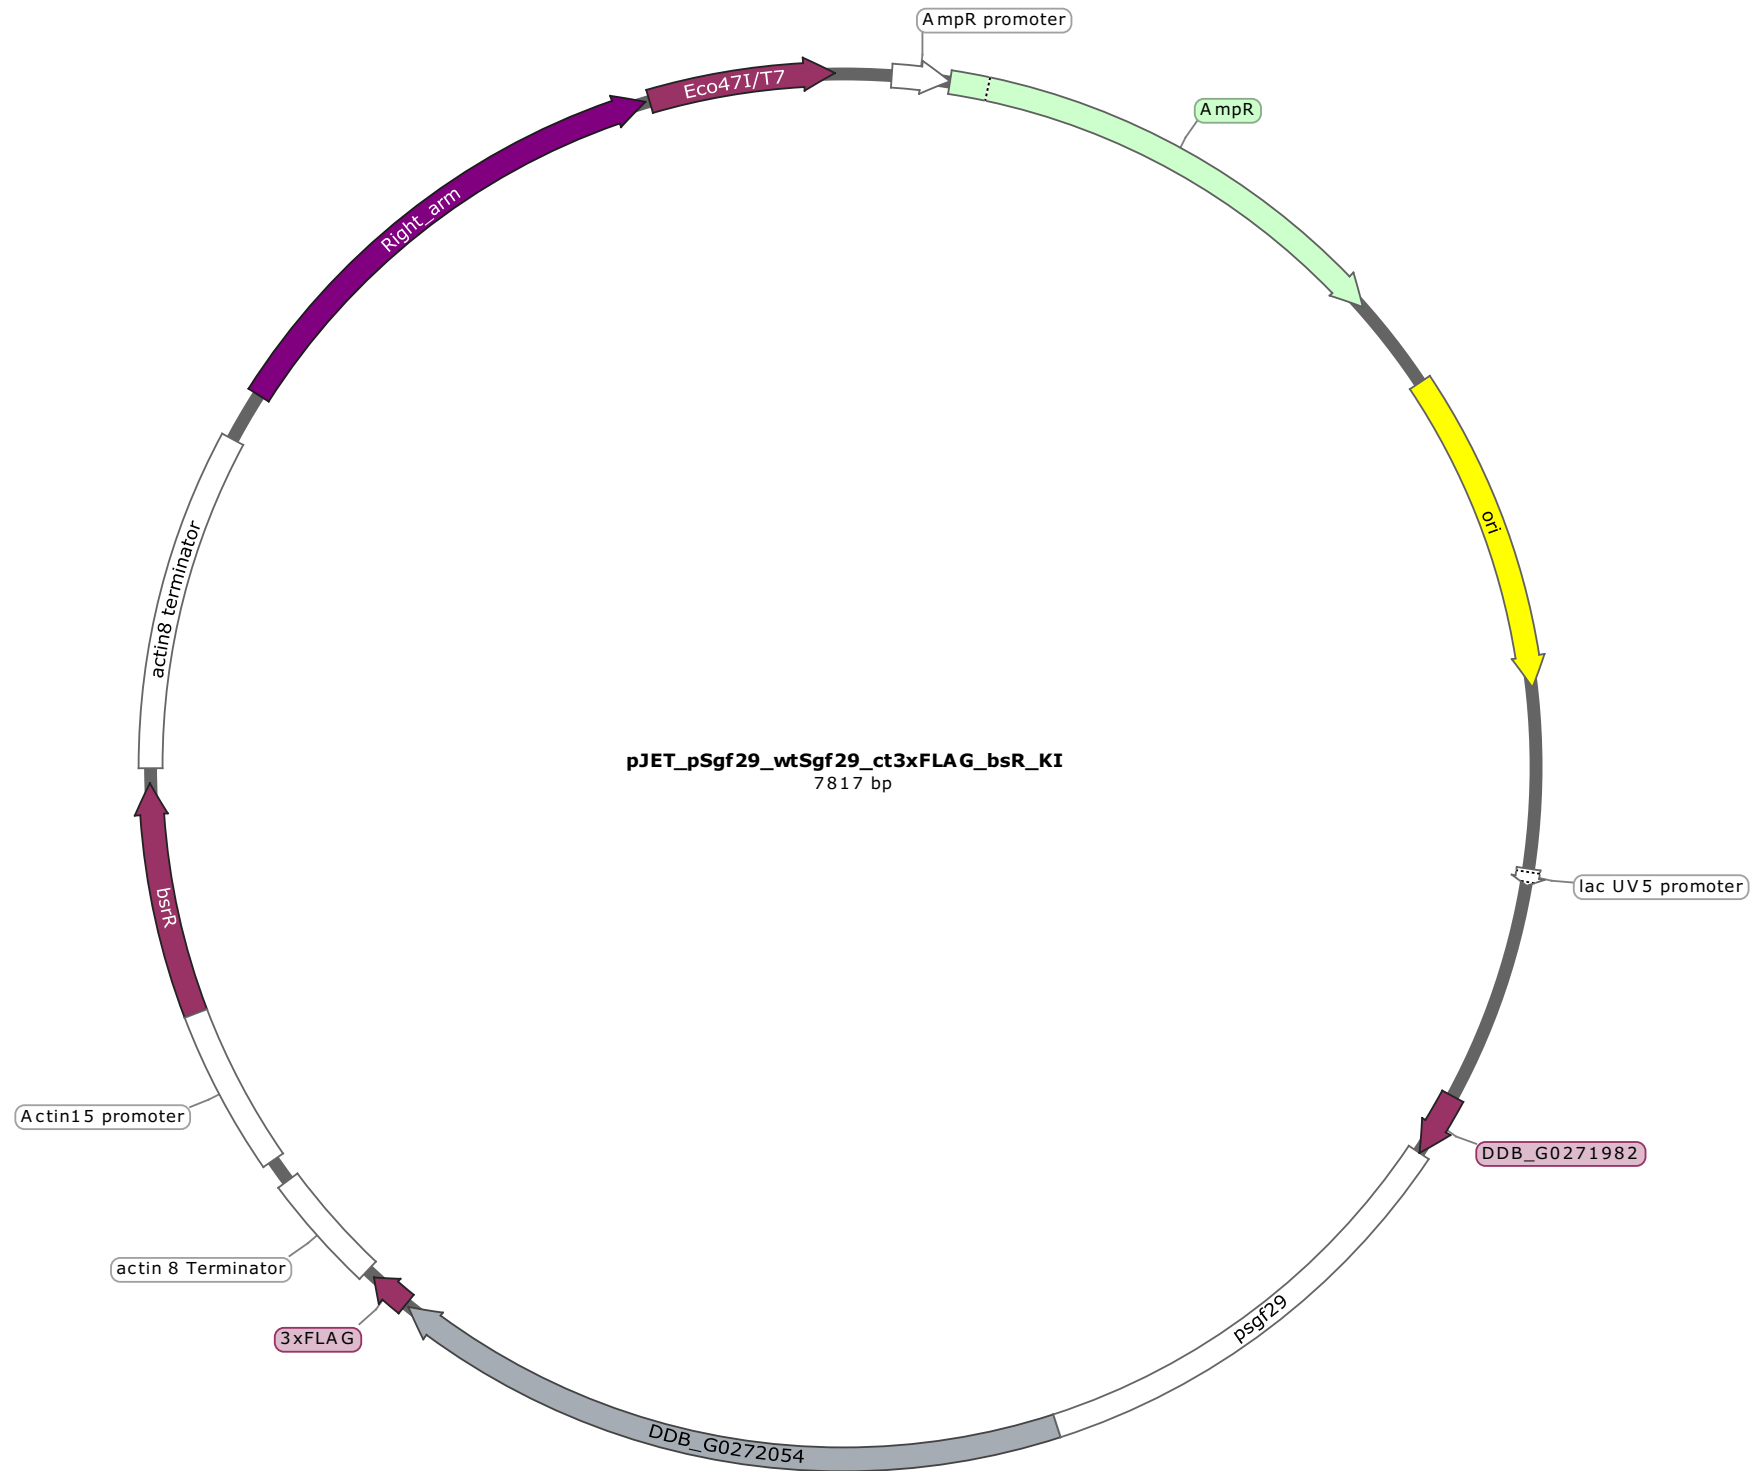

# Cloning of pJET\_pSgf29\_Sgf29\_ct3xFLAG\_bsR\_KI.pdf

8640 x 5966

Created with SnapGene

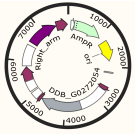

pJET\_pSgf29\_wtSgf29\_ct3xFLAG\_bsR\_KI  
7817 bp

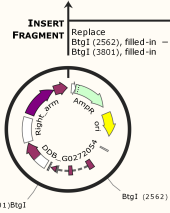

pJET-Sgf29KO  
6552 bp

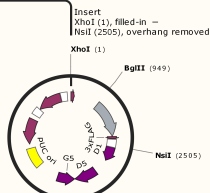

pDM304\_pSgf29\_wtSgf29\_ct3xFLAG  
8704 bp

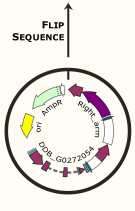

pJET-Sgf29KO  
6552 bp

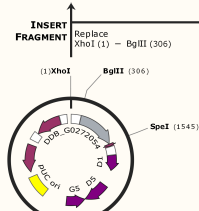

pDM304-DDB\_G0272054-CT-3xFLAG  
8261 bp

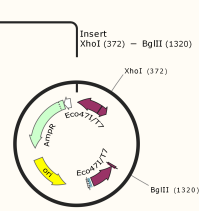

pJET\_Sgf29\_promoter  
3358 bp

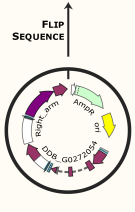

pJET-Sgf29KO  
6552 bp

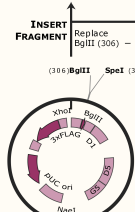

pDM304-CT-3xFLAG  
7031 bp

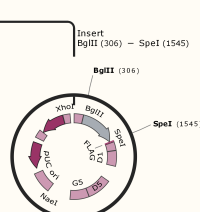

pDM304-DDB\_G0272054-CT-FLAG  
9213 bp

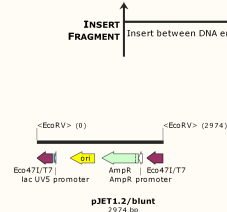

pJET1.2/blunt  
2974 bp

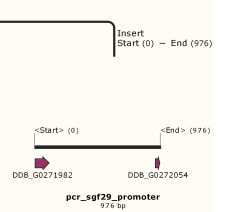

pcr\_sgf29\_promoter  
976 bp



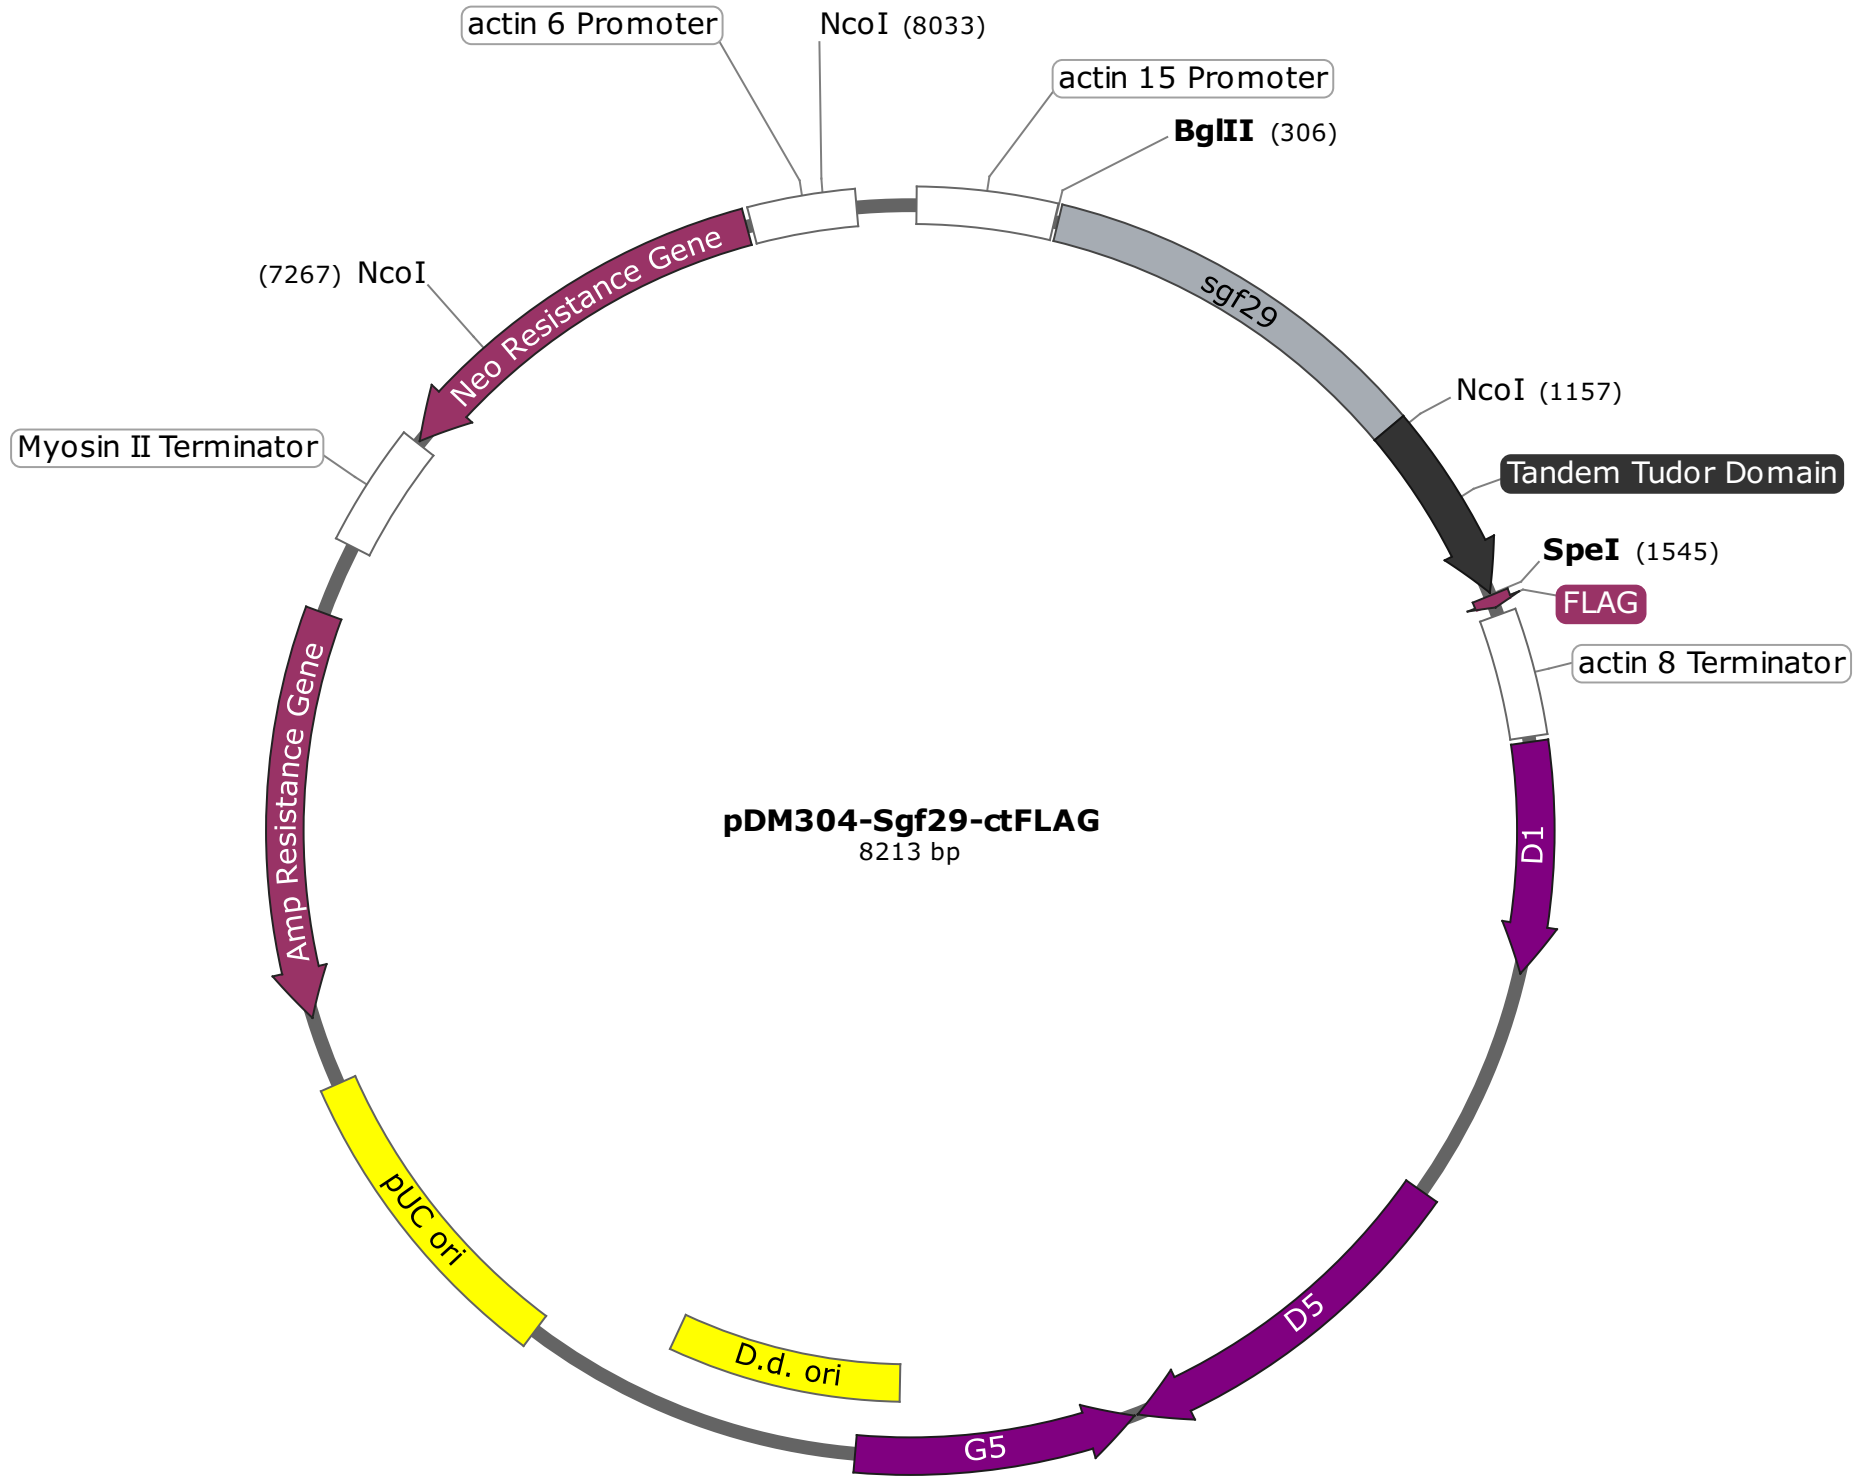

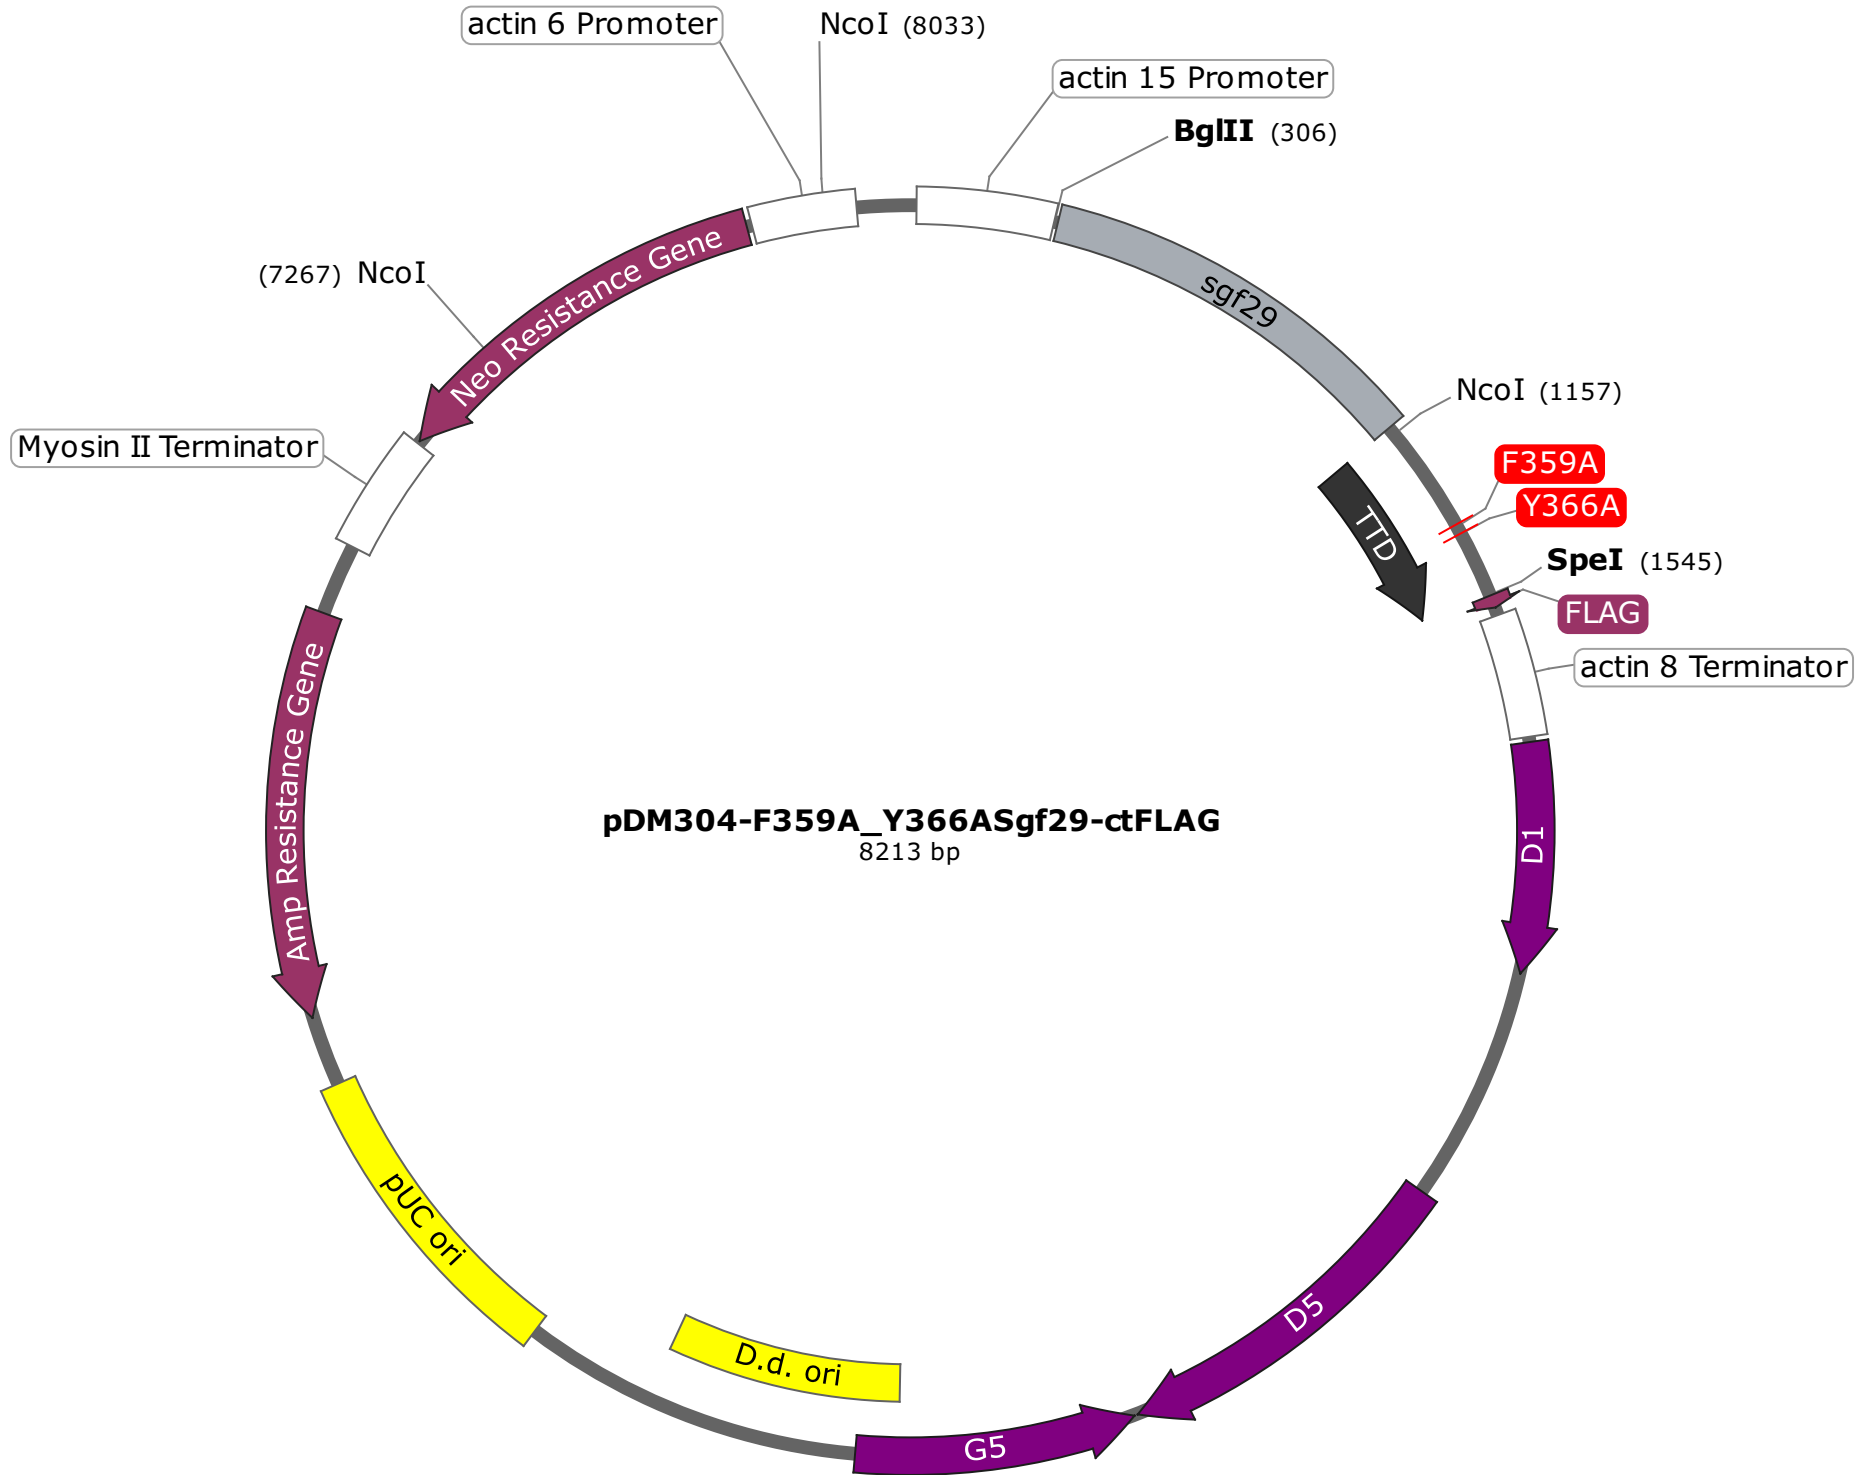

Supplement: gkab154_supplemental_file.pdf [file gkab154_supplemental_file.pdf]
